# Supplementary material for: Crumpled graphene fully decorated with nickel-based nanoparticles applied in glyphosate detection
Source: Royal Society of Chemistry journal article supplement (doi:10.1039/d4ra04399e), 2024-01-01
Supplement: d4ra04399e1.pdf [file d4ra04399e1.pdf]

## Supplementary Information

### **Crumpled Graphene Fully Decorated with Nickel-based Nanoparticles Applied in Glyphosate Detection**

*Daniel A. Gonçalves<sup>a,\*</sup>, Vitor H.N. Martins<sup>a</sup>, Diogo D. Reis<sup>b</sup>, Monize M. Silva<sup>a,\*</sup>, Victor H. R. Souza<sup>a,\*</sup>*

<sup>a</sup>Faculty of Exact Science and Technology, Universidade Federal da Grande Dourados (UFGD),  
Dourados, MS, Brazil

<sup>b</sup>Instituto de Física, Universidade Federal de Mato Grosso do Sul (UFMS), Campo Grande,  
MS, Brazil

\* Corresponding author.

E-mail addresses: daniel.araujogoncalves@gmail.com, (Daniel A. Gonçalves),  
monizemsilva@gmail.com (Monize M. Silva), victorsouza@ufgd.edu.br (Victor H. R. Souza)

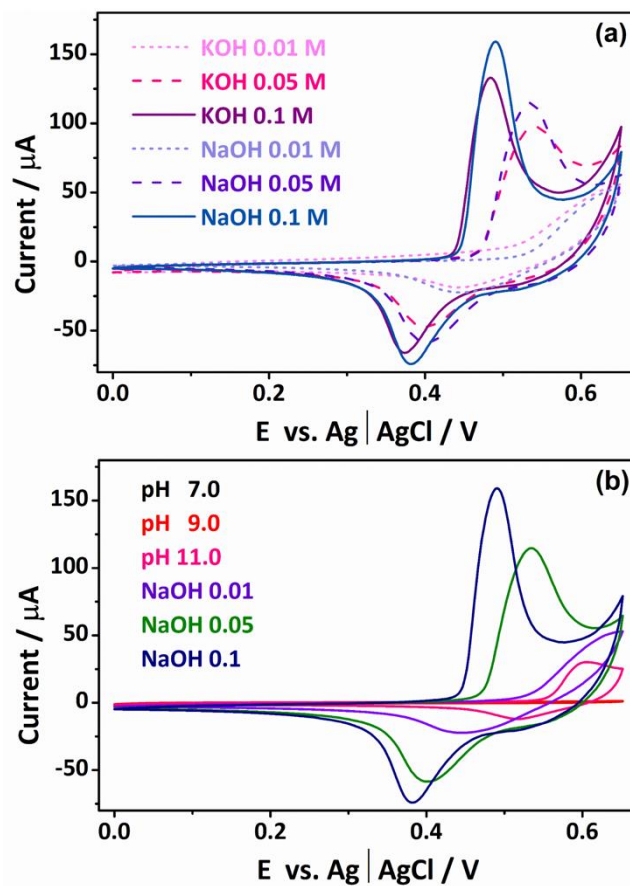

**Figure S1** - (a) CV profiles of Ni:CG/GCE at 0.01, 0.05 and 0.1 M of NaOH and KOH respectively. (b) Ni:CG/GCE CV profiles in BR Buffer (0.1 M) and NaOH.

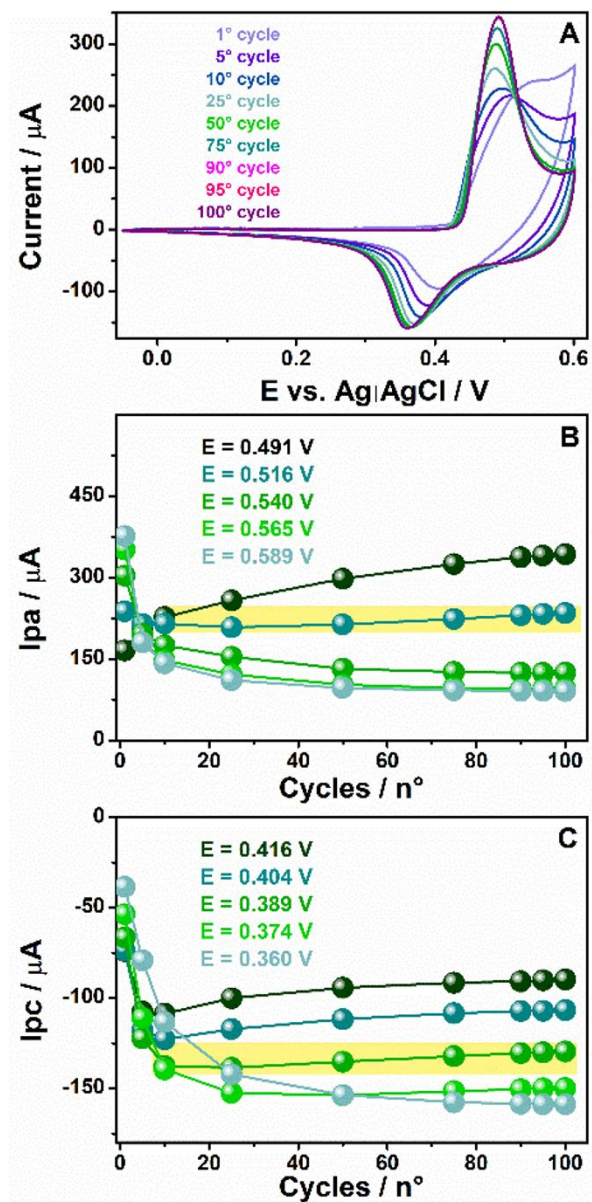

**Figure S2** - (a) Cyclic voltammograms at 50 mV s<sup>-1</sup> scan rates in 0.1 M NaOH to stabilize the Ni:CG/GCE composite. The inset displays the range for the anodic (b) and cathodic (c) scans.

**Table S1.** Electrochemical transducer used in sensor development and some current methodologies for Glyp detections.

| Summary                                  | Detection Method | LD           | Ref.      |
|------------------------------------------|------------------|--------------|-----------|
| Carbon coated Ag-Cu-grids                | SERS             | 5.00 $\mu$ M | 1         |
| BHMH-Cu <sup>2+</sup>                    | Fluorescence     | 0.41 $\mu$ M | 2         |
| MIP                                      | Amperometric     | 247 nM       | 3         |
| GC/rGO-CuNPs                             | DPV              | 190 nM       | 4         |
| FMOG                                     | HPLC-UV          | 176 nM       | 5         |
| Au-graphene-paper annealed               | Amperometric     | 85.0 nM      | 6         |
| nZVI                                     | DPV              | 76.9 nM      | 7         |
| NAC single bond Cu <sup>2+</sup> complex | Fluorescence     | 36.0 nM      | 8         |
| GrO-PE                                   | SWV              | 17.0 nM      | 9         |
| PD Product                               | SERS             | 14.7 nM      | 10        |
| HRP/PSF/MWCNT/PGE                        | Amperometric     | 14.8 nM      | 11        |
| SPE/Chi/CNO/TYR                          | Amperometric     | 6.50 nM      | 12        |
| SPE                                      | HPLC-ICP-MS/MS   | 6.45 nM      | 13        |
| iTrEnDi                                  | HPLC-MS          | 5.86 nM      | 14        |
| NPC                                      | CV               | 4.00 nM      | 15        |
| MI-NiAl-LDH                              | DPV              | 3.10 nM      | 16        |
| CG/NiONPs                                | CV               | 2.00 nM      | This Work |
| pH-gradient                              | LC-MS/MS         | 1.48 nM      | 17        |
| Reversed phase chromatographic           | LC-MS/MS         | 1.36 nM      | 18        |
| Derivatization by AQC                    | UHPLC-ESI-MS/MS  | 1.18 nM      | 19        |

Abbreviations: Limit of detection (LD); Molecularly imprinted polymer (MIP); Surface enhanced Raman scattering (SERS); 2-(benzothiazol)-4-(3-hydroxy-4-methylphenyl) imino phenol (BHMH); Copper nanoparticles and reduced graphene oxide modified a glassy carbon

electrode (GC/rGO-CuNPs); Pre-column Derivation with 9-Fluorenylmethyl Chloroformate (FMOC); Gold nanoelectrode arrays dewetted onto graphene paper (Au-graphene-paper annealed); nanozero-valent iron (nZVI); N-butyl-1,8-naphthalimide-4-hydrazino-6-isopropyl-chromone (NAC); Graphite oxide paste electrode (GrO-PE); Purple Color Dye (PD) Product; Horseradish peroxidase (HRP)/polysulfone (PSF)/ multi-walled carbon nanotube (MWCNT)/Pencil graphite electrodes (PGE) biosensor; Tyrosinase conjugated to carbon nano-ions in a chitosan matrix on a screen-printed electrode (SPE/Chi/CNO/TYR electrodes); Solid phase extraction (SPE); in situ trimethylation enhancement using diazomethane (iTrEnDi); Nanoporous Copper film (NPC); Inorganic-framework molecularly imprinted NiAl layered double hydroxide (MI-NiAl-LDH); 6-aminoquinolyl-N-hydroxysuccinimidyl carbamate (AQC); High-Performance Liquid Chromatography-Ultraviolet (HPLC-UV); High-performance liquid chromatography combined with inductively coupled plasma with triple quadrupole mass spectrometer (HPLC-ICP-MS/MS); High-performance liquid chromatography-mass spectrometry (HPLC-MS); Liquid Chromatography with tandem mass spectrometry (LC-MS-MS); Ultra-High Performance liquid chromatography–electrospray ionization multiple reaction monitoring tandem mass spectrometry; Differential Pulse Voltammetry (DPV); Square wave voltammetry (SWV); Cyclic voltammetry (CV).

#### References:

1. H. S. S. Sharma, E. Carmichael and D. McCall, *Vibrational Spectroscopy*, 2016, **83**, 159-169.
2. F. Sun, L. Yang, S. Li, Y. Wang, L. Wang, P. Li, F. Ye and Y. Fu, *Journal of Agricultural and Food Chemistry*, 2021, **69**, 12661-12673.
3. B. Uka, J. Kieninger, G. A. Urban and A. Weltin, *ACS sensors*, 2021, **6**, 2738-2746.
4. S. Setznagl and I. Cesarino, *International Journal of Environmental Analytical Chemistry*, 2022, **102**, 293-305.
5. K. K. K. Gains, N. G. K. Roland, K. Y. Urbain and D. Ardjouma, *Chromatographia*, 2022, **85**, 655-664.
6. A. Scandurra, M. Censabella, A. Gulino, M. G. Grimaldi and F. Ruffino, *Sensing and Bio-Sensing Research*, 2022, **36**, 100496.
7. A. Qureashi, A. H. Pandith, A. Bashir, L. A. Malik, T. Manzoor, F. A. Sheikh, K. Fatima and Z.-u. Haq, *Nanoscale Advances*, 2023, **5**, 742-755.
8. Q. Liu, S. Li, Y. Wang, L. Yang, M. Yue, Y. Liu, F. Ye and Y. Fu, *Science of The Total Environment*, 2023, **882**, 163548.
9. J. S. Santos, M. S. Pontes, E. F. Santiago, A. R. Fiorucci and G. J. Arruda, *Science of the total environment*, 2020, **749**, 142385.

10. M.-L. Xu, Y. Gao, Y. Li, X. Li, H. Zhang, X. X. Han, B. Zhao and L. Su, *Spectrochimica Acta Part A: molecular and biomolecular spectroscopy*, 2018, **197**, 78-82.
11. L. A. Zambrano-Intriago, C. G. Amorim, A. N. Araújo, D. Gritsok, J. M. Rodríguez-Díaz and M. C. Montenegro, *Science of the total environment*, 2023, **855**, 158865.
12. V. Sok and A. Frago, *Microchimica Acta*, 2019, **186**, 1-8.
13. J. P. Tiago, L. C. Sicupira, R. E. Barros, G. P. de Pinho and F. O. Silvério, *Journal of Environmental Science and Health, Part B*, 2020, **55**, 558-565.
14. C. A. Rosales, S. W. Shields, C. L. Aulenback, G. Elezi, K. V. Wasslen, P. J. Pallister, K. F. Faull, J. M. Manthorpe and J. C. Smith, *Journal of the American Society for Mass Spectrometry*, 2023, **34**, 948-957.
15. M. Regiart, A. Kumar, J. M. Gonçalves, G. J. Silva Junior, J. C. Masini, L. Angnes and M. Bertotti, *ChemElectroChem*, 2020, **7**, 1558-1566.
16. Y. Zhao, Y. Yan, C. Liu, D. Zhang, D. Wang, A. Ispas, A. Bund, B. Du, Z. Zhang, P. Schaaf and X. Wang, *ACS Applied Materials & Interfaces*, 2022, **14**, 35704-35715.
17. E. Okada, T. Coggan, T. Anumol, B. Clarke and G. Allinson, *Analytical and Bioanalytical Chemistry*, 2019, **411**, 715-724.
18. J. C. Ulrich and P. L. Ferguson, *Analytical and bioanalytical chemistry*, 2021, **413**, 3763-3774.
19. L. Carretta, A. Cardinali, E. Marotta, G. Zanin and R. Masin, *Journal of Chromatography A*, 2019, **1600**, 65-72.
